# Supplementary material for: Enhanced thermoelectric properties of PbTe0.95via N-type PbS nano-inclusions using a conventional sintering method
Source: Royal Society of Chemistry journal article supplement (doi:10.1039/d1tc04102a), 2021-01-01
Supplement: d1tc04102a1.pdf [file d1tc04102a1.pdf]

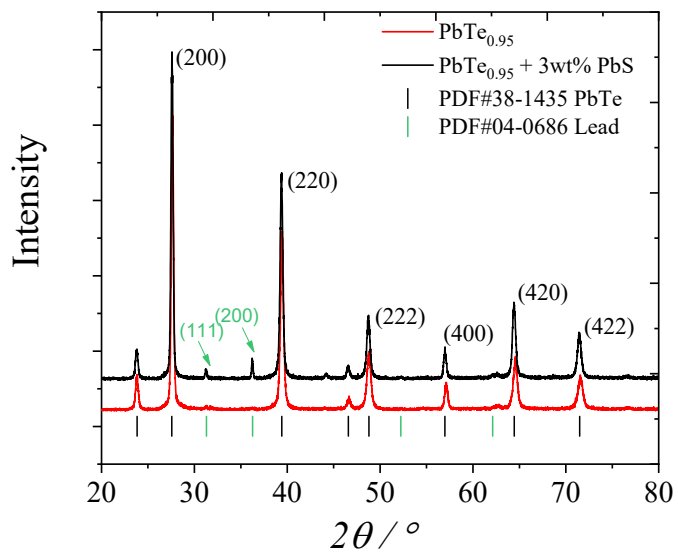

Figure S1. XRD profiles for  $\text{PbTe}_{0.95}$  and  $\text{PbTe}_{0.95} + 3\text{wt}\% \text{PbS}$  samples.

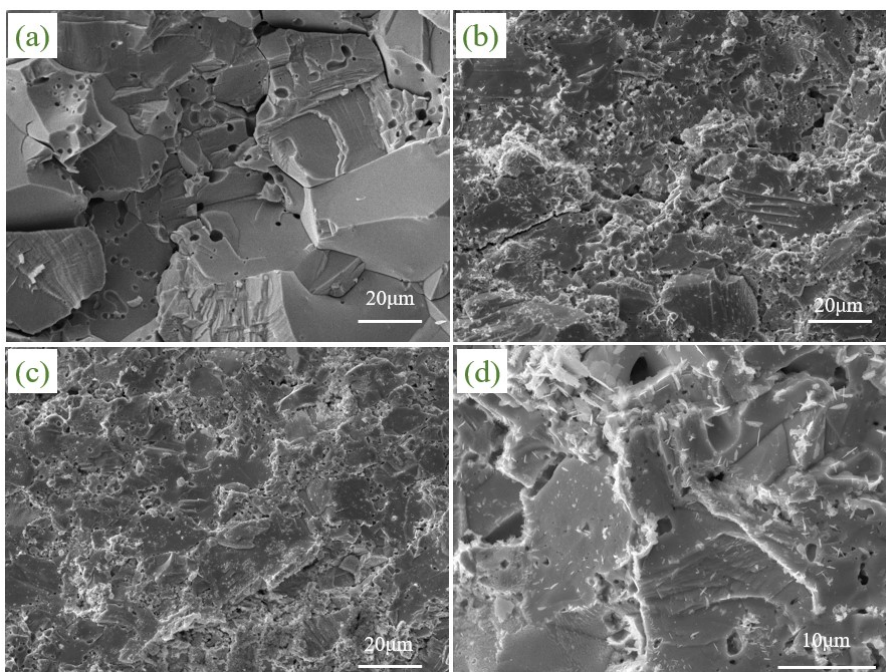

Figure S2. SEM images for (a)  $\text{PbTe}_{0.95}$  and (b-d)  $\text{PbTe}_{0.95} + 3\text{wt}\% \text{PbS}$  samples.
